# Supplementary material
Source: HighWire-hosted journal article supplement (https://www.cmaj.ca/highwire/filestream/59769/field_highwire_adjunct_files/3/151447-res-4-at.pdf)
Supplement: 151447-res-4-at.pdf [file 151447-res-4-at.pdf]

**Appendix 4 (as supplied by the authors): Risk estimation using scores and observed outcomes in derivation and validation cohorts**

**Derivation data set**

| Point total | Estimate risk of AKI-RRT (%) |       |          |                      |                      |                      |                 | Length of hospitalization stay, median(IQR) |
|-------------|------------------------------|-------|----------|----------------------|----------------------|----------------------|-----------------|---------------------------------------------|
|             |                              | N     | RRT (%)  | 30-day mortality (%) | 90-day mortality (%) | 1-year mortality (%) | 2-year ESRD (%) |                                             |
| ≤ 15        | 0 - 1.5                      | 3,328 | 13(0.4)  | 16(0.5)              | 26(0.8)              | 57(1.7)              | 0               | 10(5-19.5)                                  |
| 16 - 20     | 1.6 - 4.0                    | 1,276 | 17(1.3)  | 15(1.2)              | 20(1.6)              | 50(3.9)              | 3(0.2)          | 16(7-26)                                    |
| 21 - 25     | 4.1 - 10.5                   | 817   | 31(3.8)  | 19(2.3)              | 35(4.3)              | 63(7.7)              | 8(1)            | 20(9-37)                                    |
| 26 - 30     | 10.6 - 24.8                  | 473   | 51(10.8) | 25(5.3)              | 40(8.5)              | 72(15.2)             | 18(3.8)         | 26(13-52)                                   |
| ≥ 31        | ≥ 24.9                       | 167   | 42(25.1) | 20(12)               | 28(16.8)             | 42(25.1)             | 11(6.6)         | 41(22-71)                                   |

**Validation data set**

| Point total | Estimate risk of AKI-RRT (%) |       |          |                      |                      |                      |                 | Length of hospitalization stay, median(IQR) |
|-------------|------------------------------|-------|----------|----------------------|----------------------|----------------------|-----------------|---------------------------------------------|
|             |                              | N     | RRT (%)  | 30-day mortality (%) | 90-day mortality (%) | 1-year mortality (%) | 2-year ESRD (%) |                                             |
| ≤ 15        | 0 - 1.9                      | 2,677 | 23(0.9)  | 55(2.1)              | 67(2.5)              | 95(3.5)              | 4(0.1)          | 12(7-19)                                    |
| 16 - 20     | 2.0 - 5.1                    | 908   | 24(2.6)  | 48(5.3)              | 60(6.6)              | 79(8.7)              | 8(0.9)          | 19(11-29.5)                                 |
| 21 - 25     | 5.2 - 13.1                   | 550   | 34(6.2)  | 60(10.9)             | 71(12.9)             | 93(16.9)             | 13(2.4)         | 24(13-38)                                   |
| 26 - 30     | 13.2 - 29.8                  | 246   | 32(13)   | 31(12.6)             | 40(16.3)             | 53(21.5)             | 16(6.5)         | 26(16-48)                                   |
| ≥ 31        | ≥ 29.9                       | 86    | 24(27.9) | 26(30.2)             | 33(38.4)             | 41(47.7)             | 11(12.8)        | 32(14-65)                                   |
